# Supplementary material
Source: publisher figshare collection journal article supplement (https://tandf.figshare.com/ndownloader/files/21902154)
Supplement: Supplementary file 1 [file 21902154]

Supplementary Material

Curtin University Discourse Protocol – Adolescent version

**SCRIPT**

**GENERAL COMMENTS**

Keep dialogue during tasks to a minimum. You may use as many nonverbal prompts as required (e.g. head nods, facial expression, and eye contact). You may verbally prompt the participant **once** during each task (e.g. Tell me more, is there anything else? Is that all).

**BEGIN RECORDING**

*“Thanks for coming to talk to me today! I am going to ask you to talk to me about a range of different things. For each question, say whatever comes to mind. I’ll try my best not to interrupt you. I have my recorder with me so I can listen to what we say later on.”*

**RECOUNT**

The aim is to trigger and elicit a recent memory of an event that can be recounted. Aim to elicit three topics.

*I’ll start by asking you to tell me about some specific things that have happened to you.*

1. **Weekends -** On the weekends we usually do a lot of things like play sport catch up with friends, or do homework. Can you tell me what you did last weekend?
2. **Accident / Injury -** Have you ever hurt yourself or had an accident? Can you tell me what happened?

*Alternative if no:* What about one of your friends or family? What happened to them?

1. **Holiday -** We all love to go on holiday. When did you last go on holiday? Can you tell me what you did?

***ALTERNATIVE: Christmas / Celebration.*** We all like to celebrate traditions such as Christmas or Hanukah. What do you celebrate with your family and friends?

Can you tell me what you did last _______?

**EXPOSITION**

The aim is to trigger and elicit an explanation of the topics, below. Aim to elicit three topics.

**Note:** If the participant provides a definition, provide **one** verbal restatement of task, e.g. “Great, you’ve told me what it is, now tell me what you know about it”.

*Now I’m going to ask you about some topics. I want you to tell me what you know about them.*

1. **Bullying –** Tell me everything you know about **bullying**
2. **Social Media -** Tell me everything you know about **social media**.
3. **Obesity** - Tell me what you know about **obesity**.

***ALTERNATIVE: Pollution –*** Tell me everything you know about **pollution.**

**PERSUASION**

The aim is to trigger and elicit an opinion, and justification from the participant. Aim to elicit three topics.

*Now I’m going to ask you some questions. I want you to give me your opinion and explain to me why you think that way*.

1. **Social Media -** People say that social media is having a bad influence on teenagers. Do you think social media is a bad influence on young people and why?
2. **School Uniform -** When I was at school, students used to complain about wearing a school uniform. Do you think school uniforms should be compulsory for everyone and why?
3. **School Sport -** Not every student is good at sport. Do you think sport should be compulsory at school and why?

***ALTERNATIVE: Girls and boys in sport –*** Some people think some sports are for boys only and some sports are for girls only.Do you think boys and girls should be able to play the same sport and why?

**NARRATIVE**

Aim to elicit a fictional narrative based on the Norman Rockwell paintings a) The Young Lady with the Shiner (Figure 1; Rockwell, 1953) and b) The Runaway (Figure 2; Rockwell, 1958).

*Now we are going to something a bit different. I want you to tell me two stories.*

*I will show you two pictures. Use each picture to tell me two made up stories based on what is happening in the picture. I will give you a couple of minutes to think of each story.*

1. *The first painting is called ‘The Young Lady with the Shiner’. Tell me a story based on this picture.*

*
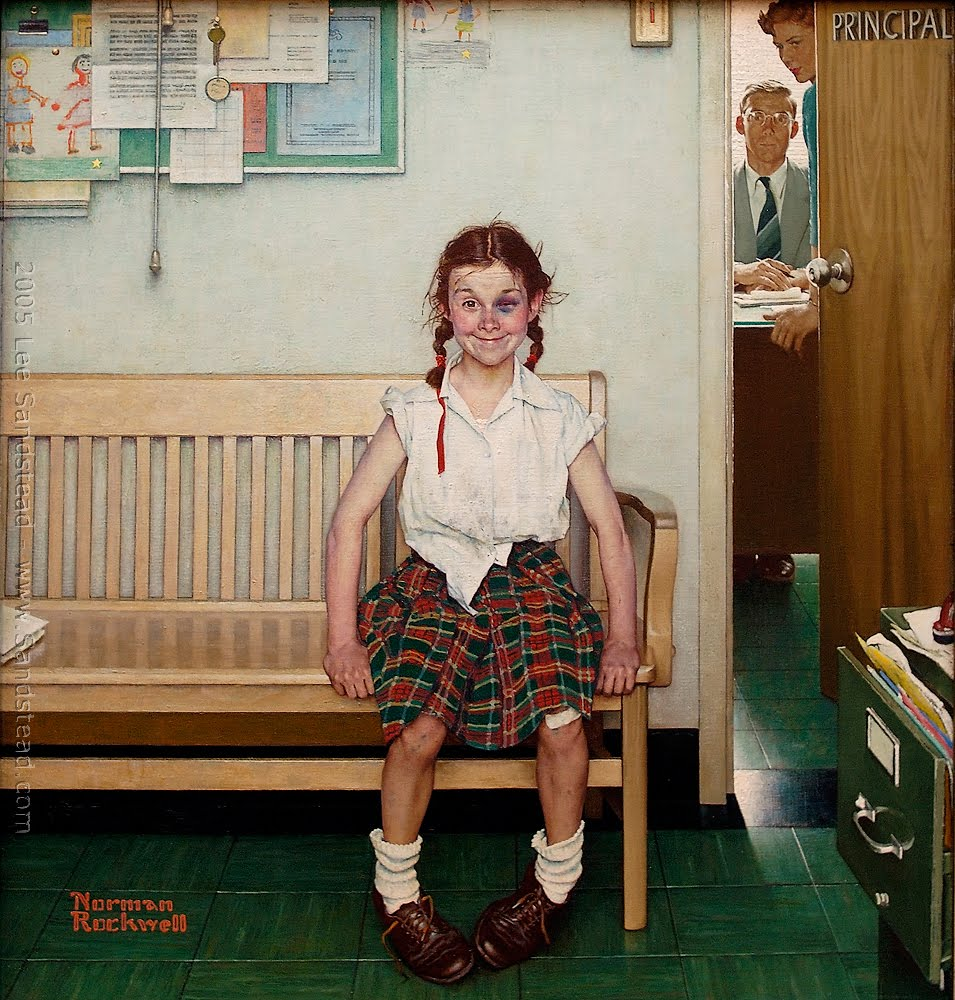
*

*Figure 1.* The Young Lady with the Shiner (Rockwell, 1953).

1. *
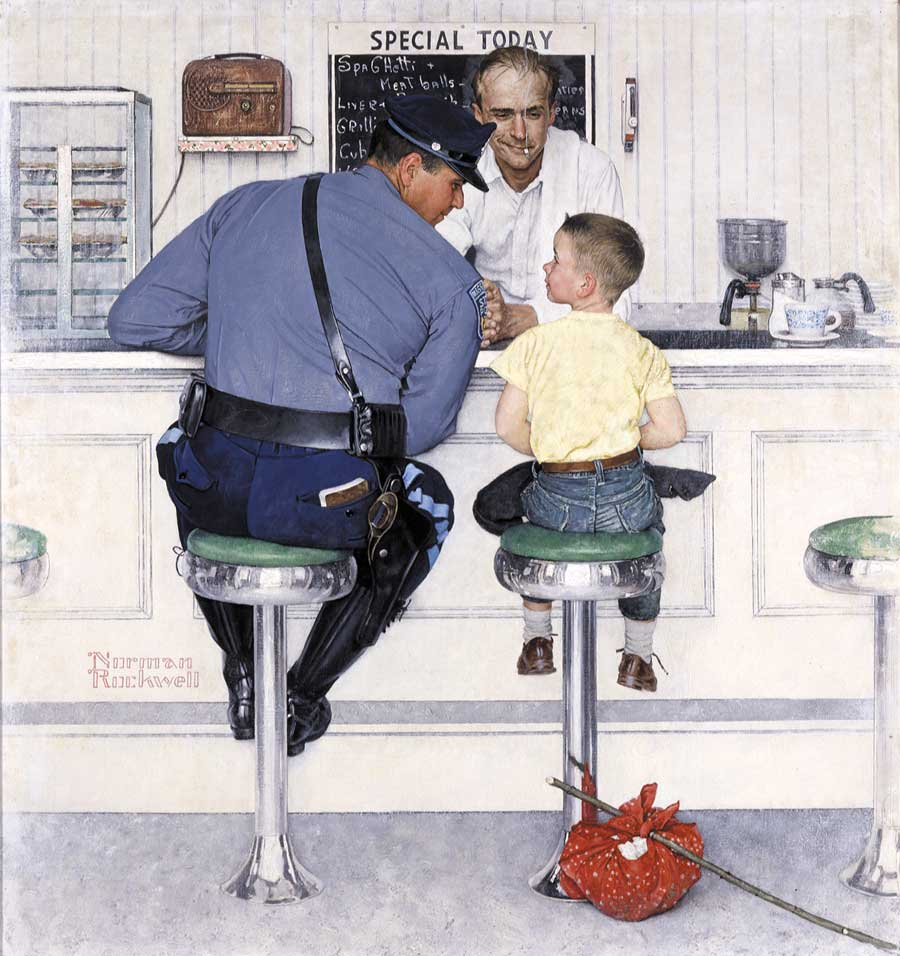
***The Runaway –** *This painting is called ‘The Runaway’. Tell me a story based on this picture.*

*Figure 2.* The Runaway (Rockwell, 1958).

**References**

Rockwell, N. (1953). The Young Lady with the Shiner. Hartford, CT: Wadsworth Antheneum.

Rockwell, N. (1958). The Runaway. Stockbridge, MA: Norman Rockwell Museum.
